# Supplementary material
Source: publisher site journal article supplement (https://www.dovepress.com/article/560049)
Supplement: Supplementary file 1 [file Supplementary%20Materials_1.docx]

**Supplementary Materials**

**S1. Materials**

# Copper(II) chloride dihydrate (CuCl₂·2H₂O) and cysteamine hydrochloride (HSCH₂CH₂NH₂·HCl) were purchased from Sigma-Aldrich. Sodium hydroxide (NaOH) and 2-methylimidazole (C₄H₆N₂) were obtained from Aladdin. Zinc nitrate hexahydrate (Zn(NO₃)₂·6H₂O), 1,3-diphenylisobenzofuran (DPBF), 5,5'-dithiobis-(2-nitrobenzoic acid) (DTNB), reduced glutathione, polyvinylpyrrolidone (PVP), and hyaluronic acid were acquired from Macklin (Shanghai, China). Specialized culture medium for A-431 cells was purchased from Cyagen Biosciences. Fetal bovine serum was obtained from Zhejiang Tianhang Biotechnology Co., Ltd. The BCA protein assay kit, rapid transfer buffer, rapid blocking buffer, and universal antibody diluent were sourced from Suzhou New Cellmate Biotechnology Co., Ltd. The PAGE gel rapid preparation kit (10%) was procured from Yeasen Biotechnology (Shanghai) Co., Ltd. DMEM high-glucose medium (1×) (with double antibiotics), Annexin V-FITC/PI apoptosis detection kit, and live/dead cell viability/toxicity assay kit were purchased from KeyGEN BioTECH. PBS (1×) was acquired from Servicebio (Wuhan, China). Trypsin digestion solution and CCK-8 assay kit were obtained from VICMED. The SOSG singlet oxygen fluorescence probe was purchased from Dalian Meilun Biotechnology Co., Ltd. The micro reduced glutathione (GSH) assay kit was sourced from Nanjing Jiancheng Bioengineering Institute. The reactive oxygen species assay kit was obtained from Beyotime Biotechnology. β-actin and CD44 polyclonal antibodies were purchased from Proteintech. Titanium sulfate was acquired from Sinopharm Chemical Reagent Co., Ltd.

**S2. Characterization**

## The characterization instruments included: transmission electron microscope (TEM, Tecnai™ G2 TWIN, FEI, USA); field emission transmission electron microscope (FETEM, Tecnai G2 F30 S-TWIN, FEI, USA); scanning electron microscope (SEM, Teneos VS, FEI, USA); UV-vis spectrophotometer (AOE UV-1902, China); X-ray diffractometer (XRD, D8 ADVANCE, Bruker, Germany); X-ray photoelectron spectrometer (XPS, ESCALAB 250 Xi, Thermo Scientific, USA); triple-purpose UV analyzer (ZF-1, Shanghai Chitang Electronics Co., Ltd., China); microplate reader (Bio-Rad Model 680, USA); fluorescence microscope (Olympus RX 73, Japan); inverted fluorescence microscope (Olympus IX 71, Japan); flow cytometer (FACSCanto II, 2-laser 8-color configuration, BD, USA); dual infrared laser imaging system (Odyssey CLX, USA); and confocal laser scanning microscope (CLSM, Leica STELLARIS 5, Germany).

**S3. catalytic experiments**

To evaluate the H₂O₂-scavenging capacity of CNZH, different concentrations (0, 10, 20, 30, 50, 100 µg/mL) of CNZH were reacted with H₂O₂ (30 μL, 30 wt%) at 37°C for 1 h. After centrifugation at 11,000 rpm for 5 min, the supernatant was mixed with titanium sulfate (Ti(SO₄)₂) and the characteristic UV-vis absorption at 407 nm was recorded.

The glutathione (GSH)-responsive property of CNZH nanocomposites was investigated using 5,5'-dithiobis(2-nitrobenzoic acid) (DTNB). Briefly, 1.5 mL GSH solution (0.3 mM) was added to 1.5 mL CNZH PBS solutions at varying concentrations (0, 25, 50, 100, 200 µg/mL) and incubated for 3 min. After vortexing for 5 min, 1 mL DTNB solution (1 mg/mL) was added, followed by UV-vis absorbance measurement at 425 nm.

Singlet oxygen (¹O₂) generation by CNZH was assessed using 1,3-diphenylisobenzofuran (DPBF) as a probe. 1 mL CNZH solution (1 mg/mL) was reacted with H₂O₂ (30 μL, 30 wt%) for 5 min, centrifuged at 11,000 rpm for 5 min, and the characteristic absorption at 410 nm was recorded by UV-vis spectroscopy.

**S4. The detail of anti-cancer experiments of CNZH in vitro**

***Hemocompatibility Evaluation***

CNZH was initially diluted with sterile deionized water to specified concentrations (25, 50, 100, 150, 200 µg/mL). A 4% murine erythrocyte suspension was prepared by mixing freshly collected mouse blood with 10 volumes of 0.9% NaCl, followed by gentle agitation and centrifugation (1,500 rpm, 15 min). After supernatant removal, pelleted erythrocytes were resuspended in 0.9% NaCl to achieve the 4% suspension. This suspension was incubated with CNZH solutions at room temperature for 4 h, then centrifuged (1,500 rpm, 5 min, 4°C). Aliquots (100 µL) of supernatant were transferred to a 96-well plate, with sterile 0.9% NaCl and deionized water serving as negative and positive controls, respectively. Hemolysis rates were quantified by measuring absorbance at 492 nm using a microplate reader.

***Cytotoxicity and Anticancer Activity Assays***

CNZH was diluted in DMEM supplemented with 10% FBS (0-200 µg/mL). Human lung epithelial cells (BEAS) and mouse fibroblasts (L-929) were seeded in 96-well plates (1×10⁴ cells/mL) and cultured to adherence. Cells were treated with CNZH for 24 h, then incubated with CCK-8 reagent for 3 h. Viability was assessed at 450 nm (triplicate measurements). The same protocol was applied to evaluate anticancer effects using human epidermoid carcinoma cells (A-431).

***CD44 Targeting Analysis via Western Blot***

A-431 cells treated with CNZH (0-200 µg/mL) were lysed, and proteins were separated by 10% SDS-PAGE before transfer to PVDF membranes. After 20-minute blocking with rapid blocking buffer and one TBST (with 0.1% Tween 20) wash, membranes were incubated overnight with anti-CD44 primary antibody, followed by 2-h incubation with secondary antibody at room temperature. Protein bands were visualized using an Odyssey CLX infrared imaging system.

**S5、In Vitro Anticancer Mechanisms of CNZH**

***Intracellular GSH Measurement***

A-431 cells (1×10⁵ cells/mL) were seeded in 6-well plates and cultured overnight for adherence. Cells were then treated with varying concentrations of CNZH (0, 50, 100, 200 μg/mL) for 24 h. Following the manufacturer’s protocol of the micro reduced glutathione (GSH) assay kit, intracellular GSH levels were quantified by measuring absorbance at 405 nm using a microplate reader.

***Singlet Oxygen (¹O₂) Detection***

A-431 cells (1×10⁴ cells/mL) were plated in 96-well plates and incubated overnight. After treatment with CNZH (0, 25, 50, 100, 150, 200 μg/mL) for 4 h, 100 μL of SOSG fluorescent probe (10 μM) was added to each well. ¹O₂ production was quantified via fluorescence measurement using a microplate reader.

***Flow Cytometry Analysis***

Cells (1×10⁶ cells/mL) were seeded in 6-well plates overnight. One group was treated with 2 mL of A-431-specific medium (control), while the other received 2 mL of medium containing CNZH (200 μg/mL). After 3 h, both groups were exposed to light irradiation and further incubated for 12 h. Cells were then stained with Annexin V-FITC and propidium iodide (PI), and apoptosis rates were analyzed using a BD FACSCanto II flow cytometer (triplicate repeats).

**S6、 In Vivo Anticancer Efficacy of CNZH**

For blood biochemical analysis, samples were allowed to clot at room temperature for 2 h, followed by centrifugation at 3,000 rpm (4°C, 15 min). The supernatant was carefully collected to assess five parameters: AST (aspartate aminotransferase), ALB (albumin), TP (total protein), GLB (globulin), and UREA (urea). For complete blood count (CBC), 200 μL of blood anticoagulated with 3.2% sodium citrate was stored at 4°C and appropriately diluted prior to measuring key hematological indices: WBC (white blood cells), RBC (red blood cells), and PLT (platelets).


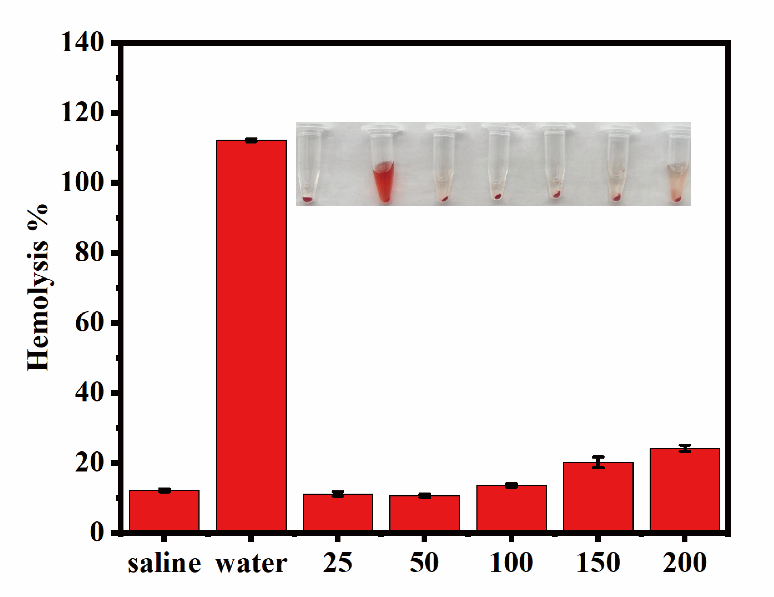


**Fig. S1.** Hemolysis rate of CNZH was determined by microplate assay.

**
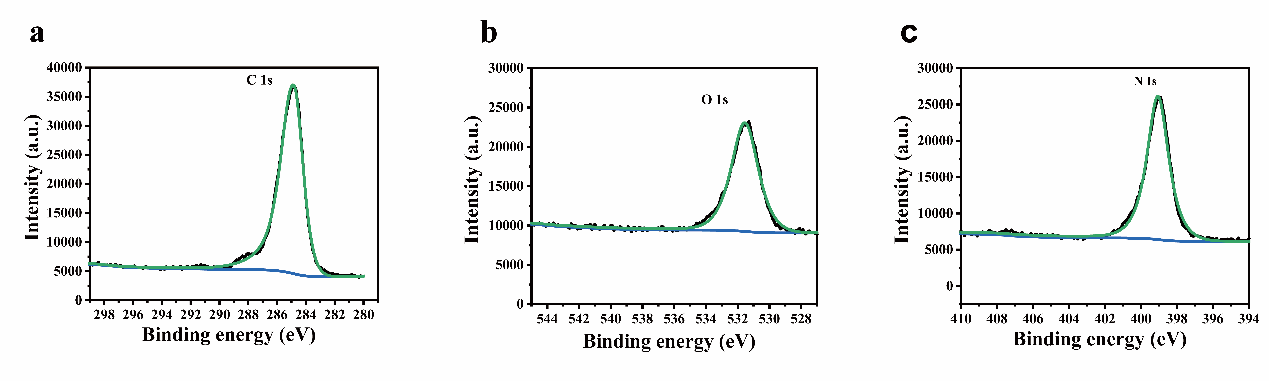
**

**Fig. S2.** (a-c) XPS peak deconvolution spectra of C1s, O1s, and N1s in CNZ.

**
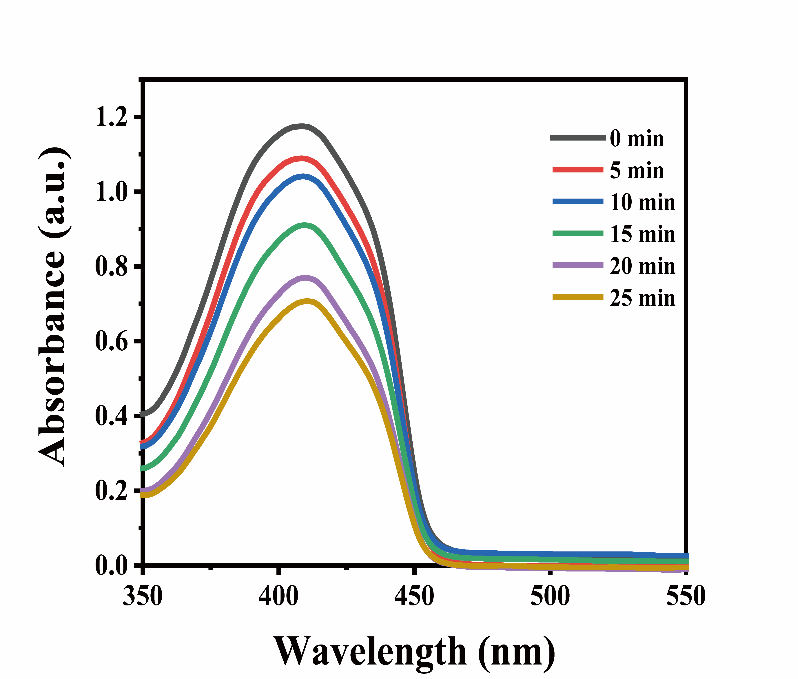
**

**Fig. S3.** Analysis of Singlet Oxygen (¹O₂) Generation Kinetics.


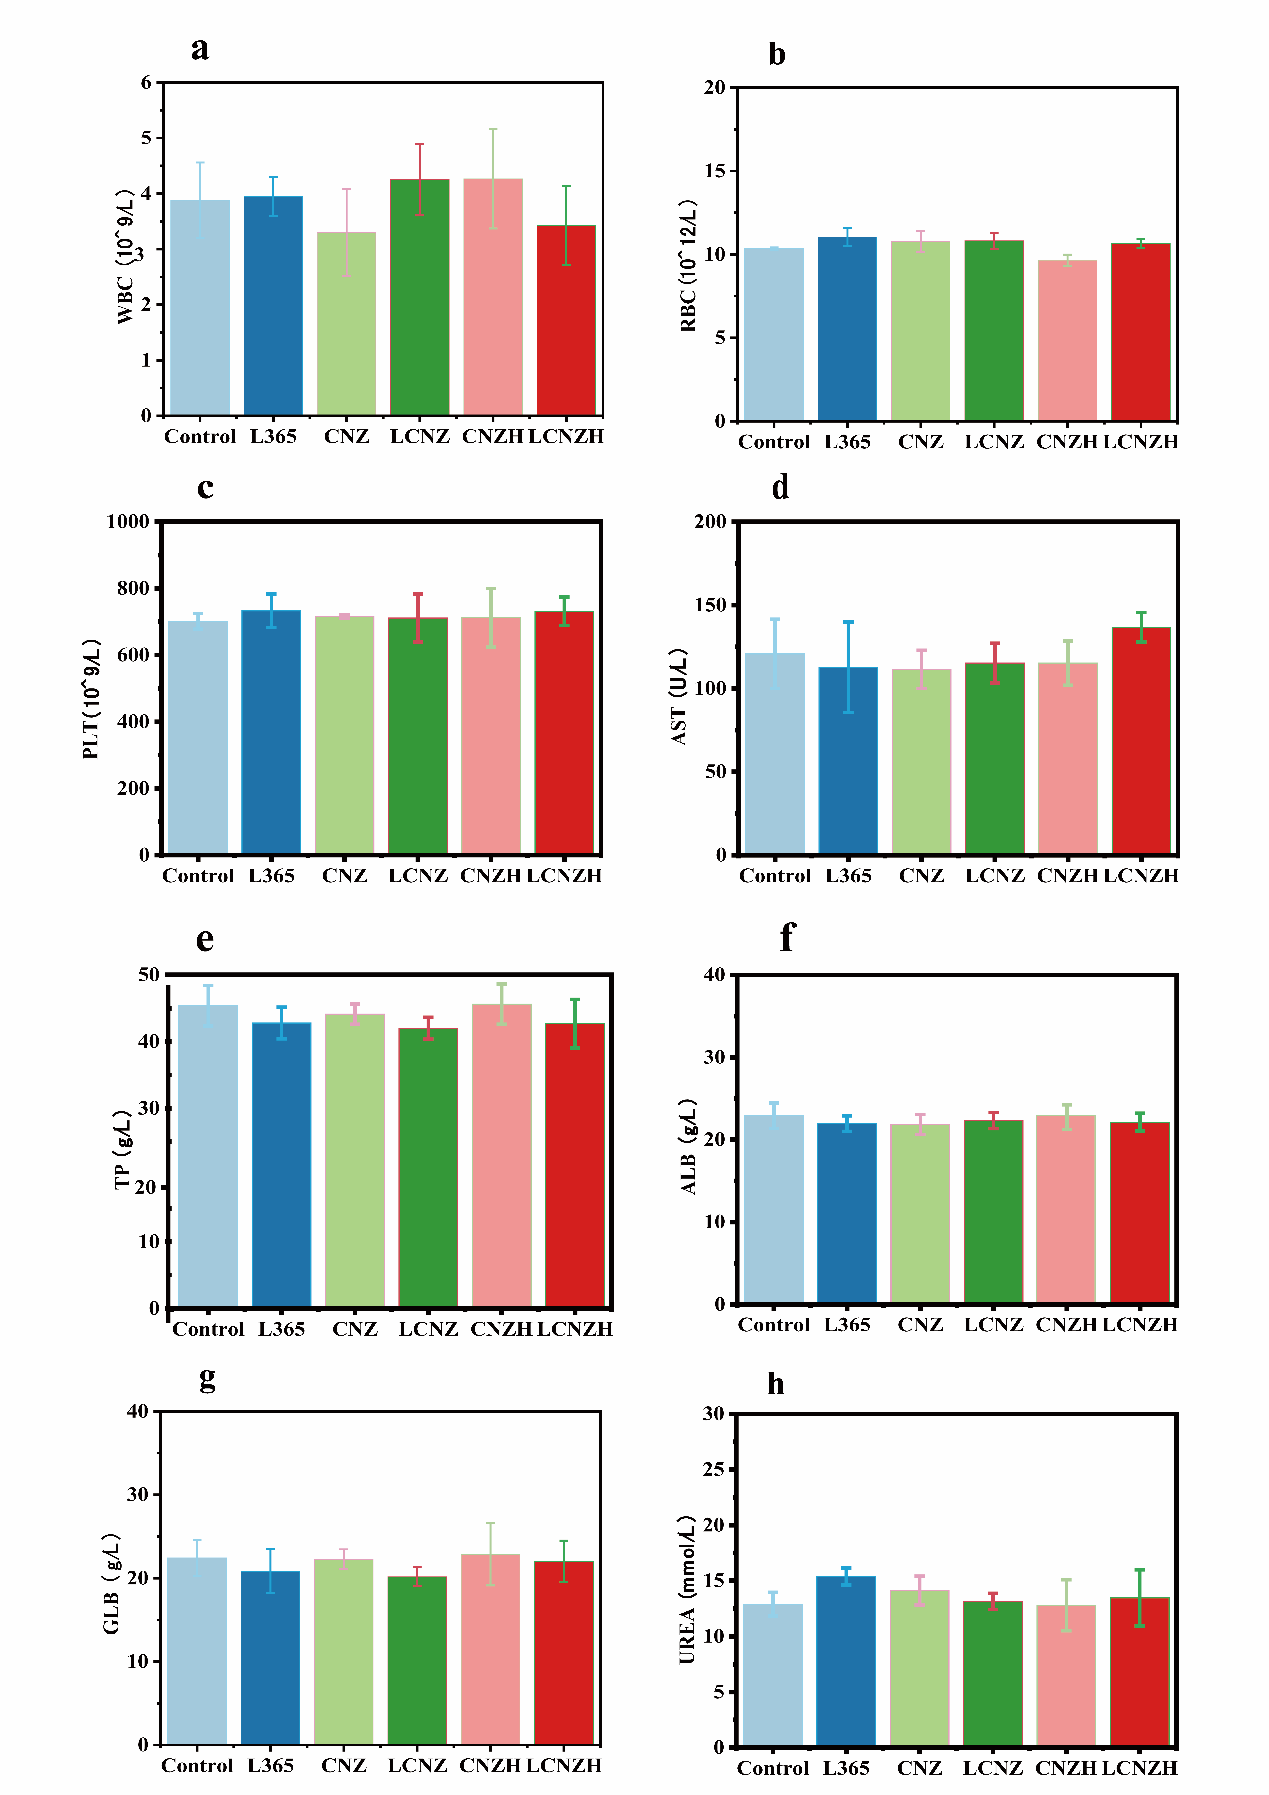


**Fig. S4.** (a-c) Hematological parameters (WBC: white blood cells; RBC: red blood cells; PLT: platelets) in A-431 tumor-bearing mice across treatment groups; (d-h) Representative biochemical indices (AST: aspartate aminotransferase; TP: total protein; ALB: albumin; UREA: urea; GLB: globulin) in A-431 tumor-bearing mice from different experimental cohorts.
